# Supplementary material for: Interleukin-36γ is expressed by neutrophils and can activate microglia, but has no role in experimental autoimmune encephalomyelitis
Source: Springer Nature journal article supplement (doi:10.1186/s12974-015-0392-7), 2015-09-17
Supplement: MOESM1 [file 9768836]

**Supplementary Table 1.** Primers used for genotyping.

| Mouse strain         | Allele           | Forward primer                    | Reverse primer                     |
|----------------------|------------------|-----------------------------------|------------------------------------|
| 2D2                  | Transgene        | 5'-cccgggcaaggctcagccatgctcctg-3' | 5'-gcgccgcaattcccagagacatccctcc-3' |
|                      | Internal control | 5'-ctaggccacagaattgaaagatct-3'    | 5'-gtaggtggaattctagcatcatcc-3'     |
| IL-36 $\gamma^{-/-}$ | Mutated          | 5'-ggcggatttctgagttggag-3'        | 5'-gcagcgcacgccttctatc-3'          |
|                      | Wild-type        | 5'-ctgggctatgtatcttca-3'          | 5'-cacacctgctggtccaagtc-3'         |
| IL-36R $^{-/-}$      | Mutated          | 5'-gccctgaatgaactgcaggacg-3'      | 5'-cacggtagccaacgctatgc-3'         |
|                      | Wild-type        | 5'-gccgctacaccacaaccag-3'         | 5'-agttcagtagtccactgccactc-3'      |
