# Supplementary material for: Interleukin-36γ is expressed by neutrophils and can activate microglia, but has no role in experimental autoimmune encephalomyelitis
Source: Springer Nature journal article supplement (doi:10.1186/s12974-015-0392-7), 2015-09-17
Supplement: MOESM2 [file 9768836]

**Supplementary Table 2.** Primers used for qRT-PCR.

| <b>mRNA</b>    | <b>Forward primer</b>           | <b>Reverse primer</b>           |
|----------------|---------------------------------|---------------------------------|
| Csf3           | 5'-aagctgtgcaccccaggag-3'       | 5'-tggagctggcttaggcactgt-3'     |
| Cxcl2          | 5'-atgccctgaagaccctgccaag-3'    | 5'-ggcagtagccttccttg-3'         |
| IL-1 $\beta$   | 5'-tcaaatctgcagcagcacatc-3'     | 5'-ccagcaggtatcatcatatccc-3'    |
| IL-36R         | 5'-aaggaagttagatggaagaaggatc-3' | 5'-ggttglatctccttcgtgtctg-3'    |
| IL-36 $\alpha$ | 5'-ttccagtcactattacctgtctccc-3' | 5'-gctccccatccttgtgcaga-3'      |
| IL-36 $\beta$  | 5'-ggcttccctccacaatcttg-3'      | 5'-accataccatctgttgtagtca-3'    |
| IL-36 $\gamma$ | 5'-caggcccttgtagcagttcca-3'     | 5'-ttagcagcaaagtaggggtccatta-3' |
