# Supplementary material for: Interleukin-36γ is expressed by neutrophils and can activate microglia, but has no role in experimental autoimmune encephalomyelitis
Source: Springer Nature journal article supplement (doi:10.1186/s12974-015-0392-7), 2015-09-17
Supplement: MOESM3 [file 9768836]

**Supplementary Table 3.** Genes that were up-regulated  $\geq 2$  times in BV2 microglial cells cultured for 6 h with recombinant IL-36 $\gamma$  (100 ng/ml), as determined using Affymetrix DNA microarrays.

| Probe Set ID | Gene Symbol  | Gene Description                                                | Hybridization signal |        |                |                | Mean   |                | Fold difference     |            |
|--------------|--------------|-----------------------------------------------------------------|----------------------|--------|----------------|----------------|--------|----------------|---------------------|------------|
|              |              |                                                                 | PBS                  | PBS    | IL-36 $\gamma$ | IL-36 $\gamma$ | PBS    | IL-36 $\gamma$ | IL-36 $\gamma$ /PBS | T test (P) |
| 17256129     | Csf3         | Colony stimulating factor 3 (granulocyte)                       | 60,9                 | 53,3   | 541,0          | 501,4          | 57,1   | 521,2          | 9,1                 | 0,0019     |
| 17391565     | IL-1 $\beta$ | Interleukin 1 beta                                              | 759,6                | 705,5  | 6437,9         | 6834,3         | 732,6  | 6636,1         | 9,1                 | 0,0011     |
| 17438995     | Cxcl2        | Chemokine (c-x-c motif) ligand 2                                | 73,2                 | 53,3   | 377,5          | 442,5          | 63,3   | 410,0          | 6,5                 | 0,0095     |
| 17245399     | Irak3        | Interleukin-1 receptor-associated kinase 3                      | 212,5                | 206,8  | 845,3          | 889,8          | 209,7  | 867,5          | 4,1                 | 0,0012     |
| 17344873     | H2-M2        | Histocompatibility 2, m region locus 2                          | 251,9                | 249,9  | 1034,2         | 1014,5         | 250,9  | 1024,3         | 4,1                 | 0,0002     |
| 17322355     | Gpr84        | G protein-coupled receptor 84                                   | 378,0                | 429,5  | 1438,4         | 1655,1         | 403,8  | 1546,7         | 3,8                 | 0,0094     |
| 17405082     | Slc7a11      | Solute carrier family 7 (cationic amino acid transporter, 204,9 | 198,2                | 780,8  | 741,0          | 201,6          | 760,9  | 3,8            | 0,0013              |            |
| 17330967     | Nfkbiz       | Nuclear factor of kappa light polypeptide gene enhanc           | 162,2                | 195,1  | 684,3          | 615,4          | 178,7  | 649,8          | 3,6                 | 0,0065     |
| 17253707     | Nos2         | Nitric oxide synthase 2, inducible                              | 1060,9               | 965,7  | 3626,0         | 3497,8         | 1013,3 | 3561,9         | 3,5                 | 0,0010     |
| 17391554     | Il1a         | Interleukin 1 alpha                                             | 2531,2               | 2520,7 | 8375,6         | 8810,6         | 2526,0 | 8593,1         | 3,4                 | 0,0013     |
| 17454166     | Pilra        | Paired immunoglobulin-like type 2 receptor alpha                | 580,3                | 599,8  | 1874,4         | 2018,9         | 590,1  | 1946,6         | 3,3                 | 0,0029     |
| 17514435     | Casp4        | Caspase 4, apoptosis-related cysteine peptidase                 | 386,8                | 422,0  | 1168,2         | 1183,8         | 404,4  | 1176,0         | 2,9                 | 0,0006     |
| 17344309     | Tnf          | Tumor necrosis factor                                           | 1003,0               | 1004,4 | 2779,0         | 3031,8         | 1003,7 | 2905,4         | 2,9                 | 0,0044     |
| 17321683     | Slc11a2      | Solute carrier family 11 (proton-coupled divalent metal         | 442,1                | 419,7  | 1158,0         | 1216,4         | 430,9  | 1187,2         | 2,8                 | 0,0017     |
| 17429933     | Zc3h12a      | Zinc finger ccch type containing 12a                            | 222,1                | 261,7  | 686,3          | 637,4          | 241,9  | 661,9          | 2,7                 | 0,0056     |
| 17487855     | Pou2f2       | Pou domain, class 2, transcription factor 2                     | 122,5                | 130,2  | 387,2          | 300,3          | 126,4  | 343,7          | 2,7                 | 0,0380     |
| 17454179     | Pilrb1       | Paired immunoglobulin-like type 2 receptor beta 1               | 339,2                | 396,3  | 1027,4         | 927,9          | 367,8  | 977,7          | 2,7                 | 0,0087     |
| 17232152     | Vnn3         | Vanin 3                                                         | 98,7                 | 98,7   | 268,0          | 232,1          | 98,7   | 250,0          | 2,5                 | 0,0138     |
| 17358797     | Fas          | Fas (tnf receptor superfamily member 6)                         | 52,3                 | 52,7   | 148,6          | 115,6          | 52,5   | 132,1          | 2,5                 | 0,0404     |
| 17470060     | Rassf4       | Ras association (ralgds/af-6) domain family member 4            | 446,3                | 434,9  | 1108,0         | 1073,5         | 440,6  | 1090,8         | 2,5                 | 0,0008     |
| 17476372     | Nfkbid       | Nuclear factor of kappa light polypeptide gene enhanc           | 443,9                | 464,9  | 1111,3         | 1128,5         | 454,4  | 1119,9         | 2,5                 | 0,0004     |
| 17454187     | Pilrb2       | Paired immunoglobulin-like type 2 receptor beta 2               | 72,9                 | 56,3   | 150,2          | 166,8          | 64,6   | 158,5          | 2,5                 | 0,0153     |
| 17432674     | Tnfrsf1b     | Tumor necrosis factor receptor superfamily, member 1            | 1799,9               | 1801,9 | 4489,3         | 4215,5         | 1800,9 | 4352,4         | 2,4                 | 0,0029     |
| 17481556     | Ppfbp2       | Ptprf interacting protein, binding protein 2 (liprin beta 2     | 75,8                 | 86,6   | 210,9          | 180,7          | 81,2   | 195,8          | 2,4                 | 0,0190     |
| 17302475     | Irg1         | Immunoresponsive gene 1                                         | 3196,1               | 2986,0 | 7496,1         | 7238,8         | 3091,1 | 7367,5         | 2,4                 | 0,0015     |
| 17218060     | Ptgs2        | Prostaglandin-endoperoxide synthase 2                           | 1862,7               | 2013,7 | 4551,6         | 4483,1         | 1938,2 | 4517,4         | 2,3                 | 0,0010     |
| 17406279     | Tlr2         | Toll-like receptor 2                                            | 202,3                | 198,5  | 465,2          | 465,8          | 200,4  | 465,5          | 2,3                 | 0,0001     |
| 17470627     | Clec4e       | C-type lectin domain family 4, member e                         | 1068,3               | 1082,4 | 2436,3         | 2519,0         | 1075,4 | 2477,6         | 2,3                 | 0,0009     |
| 17508523     | Rab11fip1    | Rab11 family interacting protein 1 (class i)                    | 183,0                | 181,7  | 420,1          | 418,3          | 182,4  | 419,2          | 2,3                 | 0,0000     |
| 17459196     | Tnfp3        | Tnfaip3 interacting protein 3                                   | 1451,5               | 1317,5 | 3090,0         | 3274,1         | 1384,5 | 3182,1         | 2,3                 | 0,0040     |

| Probe Set ID | Gene Symbol  | Gene Description                                      | Hybridization signal |        |        |        | Mean   |        | Fold difference |            |
|--------------|--------------|-------------------------------------------------------|----------------------|--------|--------|--------|--------|--------|-----------------|------------|
|              |              |                                                       | PBS                  | PBS    | IL-36γ | IL-36γ | PBS    | IL-36γ | IL-36γ/PBS      | T test (P) |
| 17281219     | Nfkb1a       | Nuclear factor of kappa light polypeptide gene enhanc | 639,1                | 618,4  | 1485,1 | 1396,0 | 628,8  | 1440,6 | 2,3             | 0,0032     |
| 17254047     | Ccl7         | Chemokine (c-c motif) ligand 7                        | 1613,9               | 1672,5 | 3742,5 | 3739,8 | 1643,2 | 3741,2 | 2,3             | 0,0002     |
| 17266157     | Cpd          | Carboxypeptidase d                                    | 890,1                | 956,8  | 2048,9 | 2087,2 | 923,5  | 2068,1 | 2,2             | 0,0011     |
| 17512809     | Hp           | Haptoglobin                                           | 278,3                | 280,8  | 604,0  | 628,6  | 279,6  | 616,3  | 2,2             | 0,0013     |
| 17254166     | Slfn2        | Schlafen 2                                            | 496,6                | 534,3  | 1114,8 | 1110,9 | 515,5  | 1112,9 | 2,2             | 0,0010     |
| 17309981     | Fyb          | Fyn binding protein                                   | 540,2                | 532,6  | 1128,9 | 1172,2 | 536,4  | 1150,5 | 2,1             | 0,0013     |
| 17548123     | Ehd1 // Ehd1 | Eh-domain containing 1 // eh-domain containing 1      | 63,3                 | 61,8   | 129,6  | 124,6  | 62,6   | 127,1  | 2,0             | 0,0016     |
| 17226771     | Ikbke        | Inhibitor of kappab kinase epsilon                    | 453,0                | 495,5  | 983,3  | 934,8  | 474,3  | 959,1  | 2,0             | 0,0044     |
| 17262855     | Tnip1        | Tnfaip3 interacting protein 1                         | 651,0                | 662,6  | 1336,4 | 1317,5 | 656,8  | 1326,9 | 2,0             | 0,0003     |
| 17410542     | Nfkb1        | Nuclear factor of kappa light polypeptide gene enhanc | 683,1                | 717,3  | 1425,9 | 1399,4 | 700,2  | 1412,7 | 2,0             | 0,0009     |
